# Supplementary material for: Mg–porphyrin complex doped divinylbenzene based porous organic polymers (POPs) as highly efficient heterogeneous catalysts for the conversion of CO2 to cyclic carbonates
Source: Royal Society of Chemistry journal article supplement (doi:10.1039/c8dt02913j), 2018-01-01
Supplement: c8dt02913j1.pdf [file c8dt02913j1.pdf]

Supporting Information

## **Mg-Porphyrin complex doped divinylbenzene based porous organic polymers (POPs) as highly efficient heterogeneous catalysts for the conversion of CO<sub>2</sub> to cyclic carbonates**

Wenlong Wang,<sup>\*a</sup> Cunyao Li,<sup>b</sup> Jutao Jin,<sup>a</sup> Li Yan,<sup>b</sup> Yunjie Ding<sup>\*b</sup>

<sup>a</sup> School of Environment and Civil Engineering, Dongguan University of Technology, Dongguan 523808, China

<sup>b</sup> Dalian National Laboratory for Clean Energy, Dalian Institute of Chemical Physics, Chinese Academy of Sciences, Dalian, 116023, China.

Email: wangwl@dgut.edu.cn, dyj@dicp.ac.cn.

### **Contents**

|                                                                            |    |
|----------------------------------------------------------------------------|----|
| General information .....                                                  | 1  |
| <sup>1</sup> H NMR copies of known products .....                          | 2  |
| ICP data of Mg-Por\DVB@POPs .....                                          | 5  |
| Thermal gravimetric analysis (TGA) .....                                   | 6  |
| CO <sub>2</sub> adsorption analysis .....                                  | 6  |
| Photograph of solid situation of Mg-Por\DVB(1:20)@POPs.....                | 7  |
| Representative GC chromatography .....                                     | 7  |
| N <sub>2</sub> adsorption and desorption analysis.....                     | 8  |
| SEM&TEM characterization .....                                             | 9  |
| Solid-state <sup>13</sup> C NMR spectra .....                              | 12 |
| Elemental analysis data .....                                              | 13 |
| XPS analysis of Mg bonding energy of the five Mg-Por\DVB@POPs samples..... | 14 |

### **General information**

Carbon dioxide is commercially available with 99.99% purity. All the solvents were purchased with analytically pure without further purification, and epoxides were also purchased with high purity (> 98%).

NMR data were obtained on a Bruker AV-400 MHz spectrometer. TGA curves were measured on a STA449F3 analyzer. Inductively coupled plasma spectroscopy (ICP) was tested on a PerkinElmer apparatus Optima 7300 DV. The CO<sub>2</sub> adsorption isotherms of POPs catalysts at 273 K were carried out on IGA-100A Hiden Analytical.

### **<sup>1</sup>H NMR copies of known products**

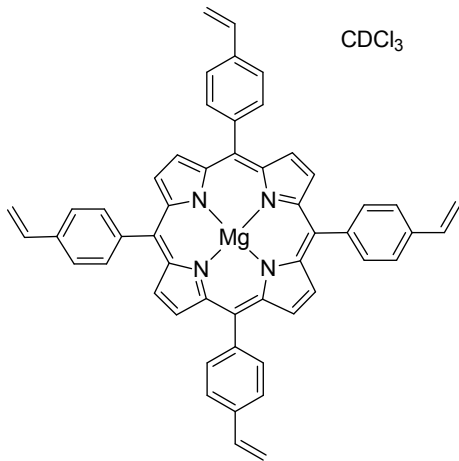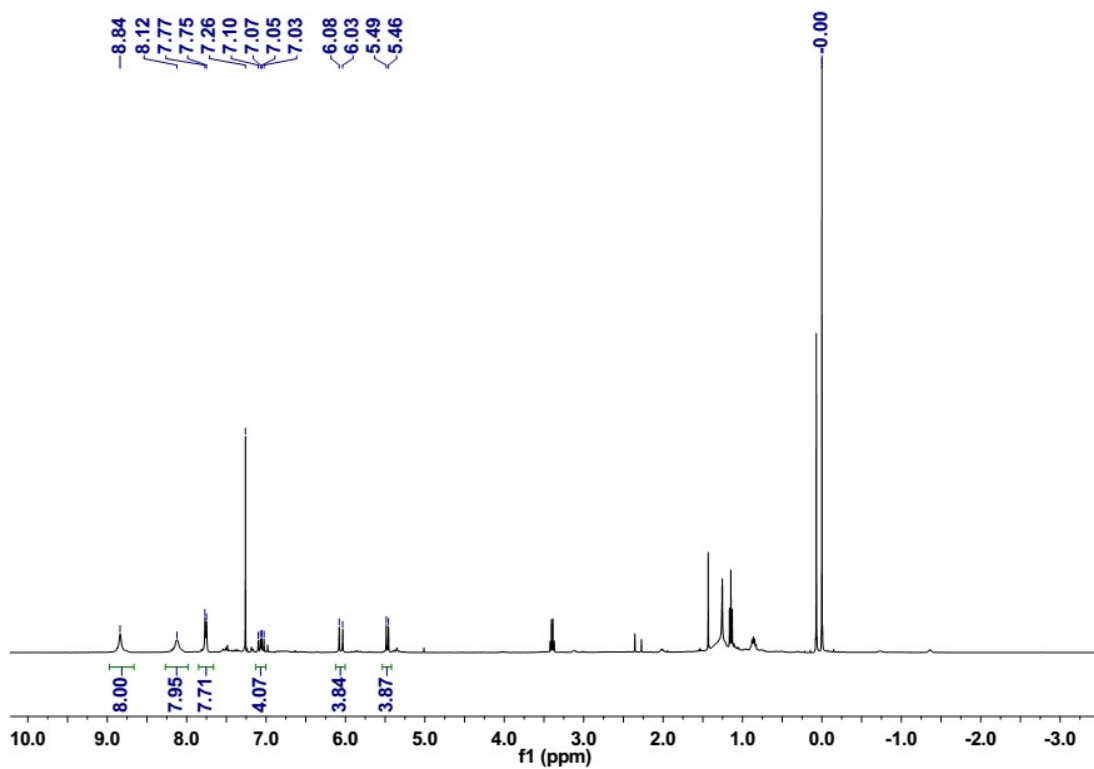

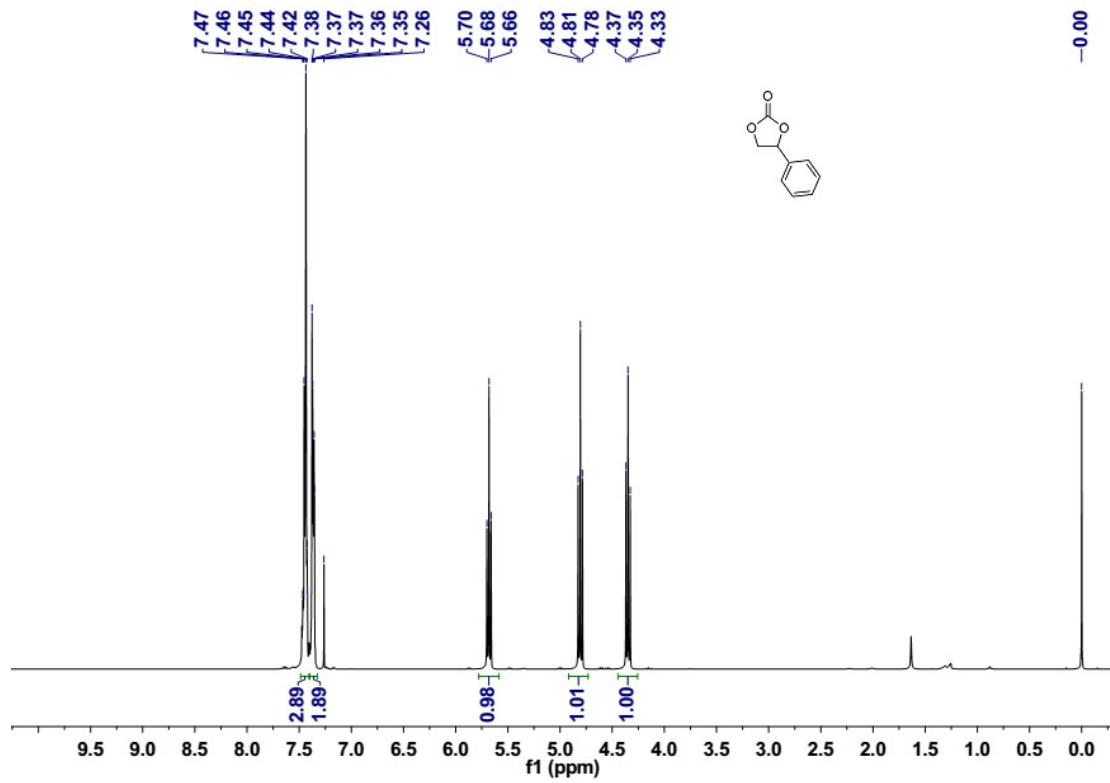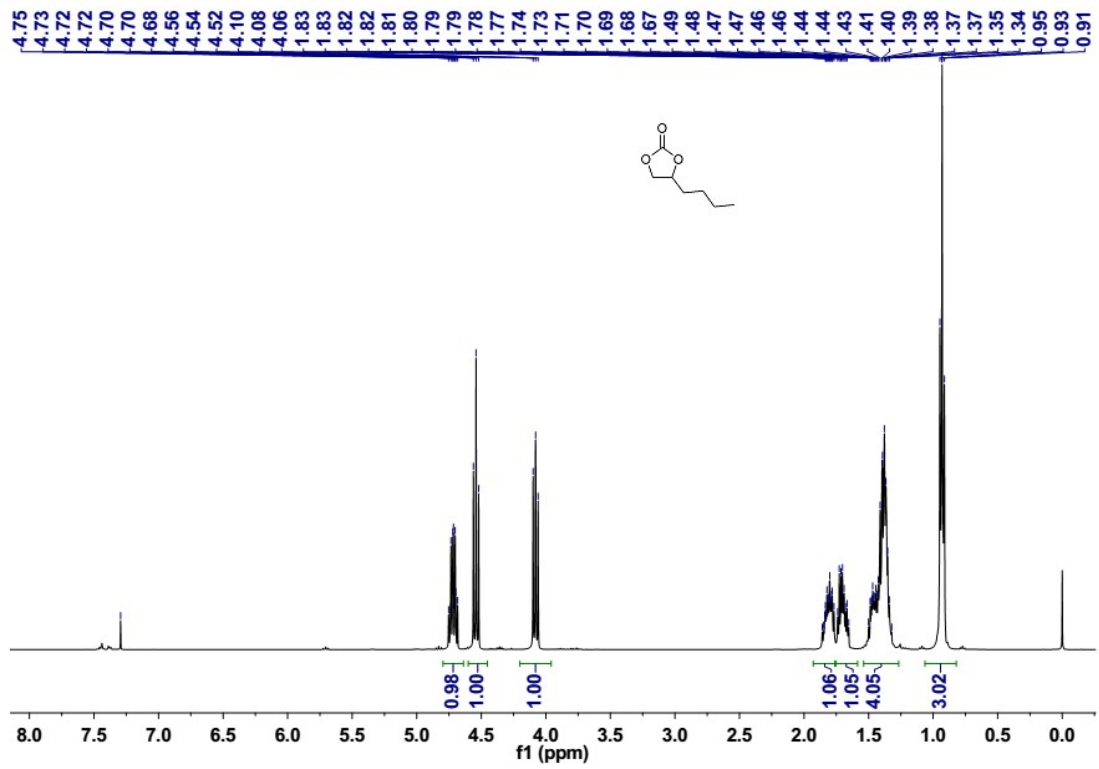

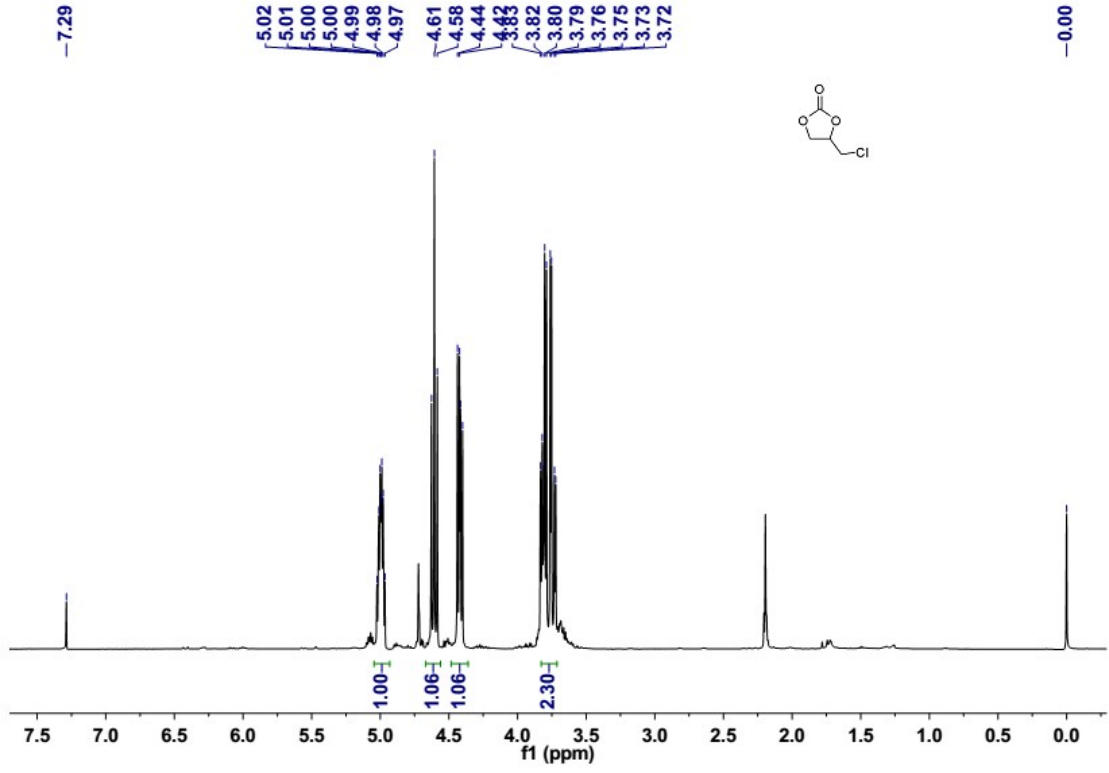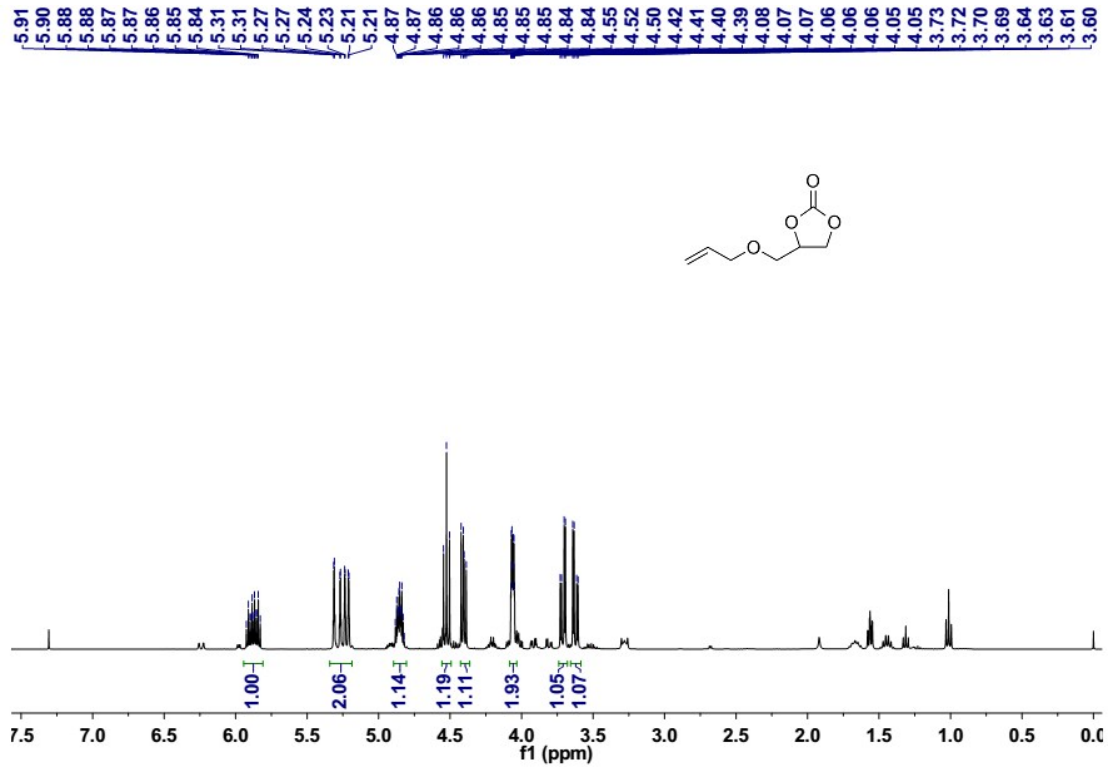

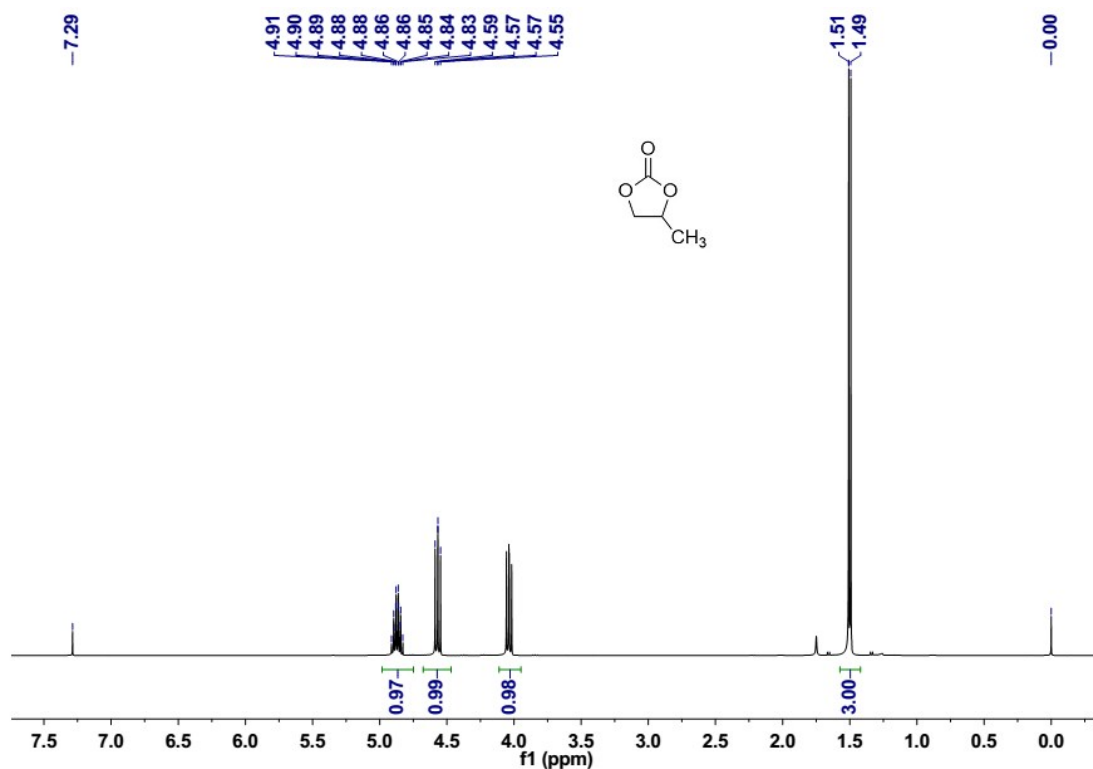

## ICP data of Mg-Por\DVB@POPs

**Table S1** ICP data of Mg-Por\DVB@POPs with different Mg content.

| Sample                 | Theoretical Mg content<br>(wt %) | Measured Mg content<br>(wt %) |
|------------------------|----------------------------------|-------------------------------|
| Mg-Por\DVB(1:20)@POPs  | 0.73                             | 0.70                          |
| Mg-Por\DVB(1:40)@POPs  | 0.41                             | 0.38                          |
| Mg-Por\DVB(1:60)@POPs  | 0.28                             | 0.29                          |
| Mg-Por\DVB(1:80)@POPs  | 0.22                             | 0.20                          |
| Mg-Por\DVB(1:100)@POPs | 0.18                             | 0.19                          |

## Thermal gravimetric analysis (TGA)

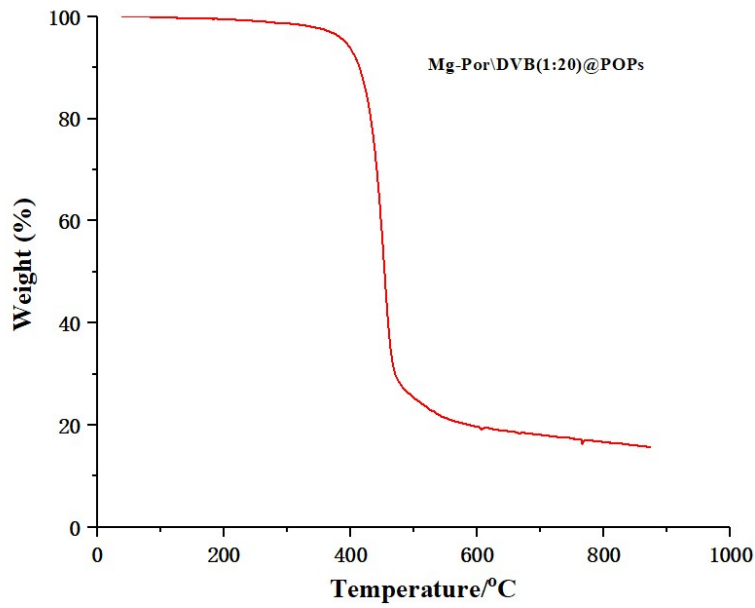

**Fig. S1.** TGA analysis of Mg-Por\DVB(1:20)POPs

## CO<sub>2</sub> adsorption analysis

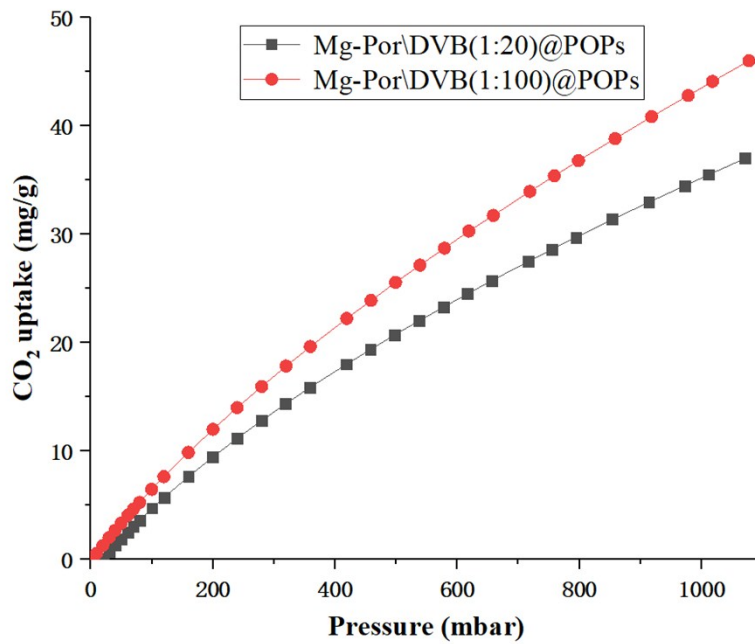

**Fig. S2.** CO<sub>2</sub> adsorption analysis of Mg-Por\DVB(1:20)@POPs and Mg-Por\DVB(1:100)@POPs

## Photograph of solid situation of Mg-Por\DVB(1:20)@POPs

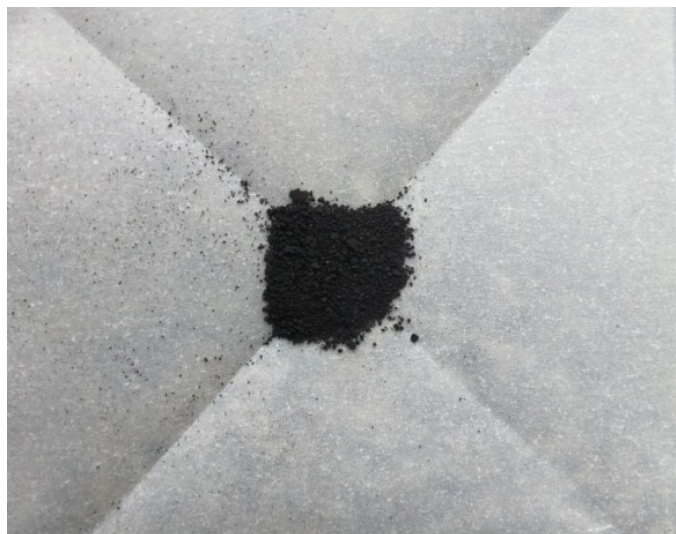

**Fig. S3.** Photograph of solid situation of Mg-Por\DVB(1:20)@POPs

## Representative GC chromatography

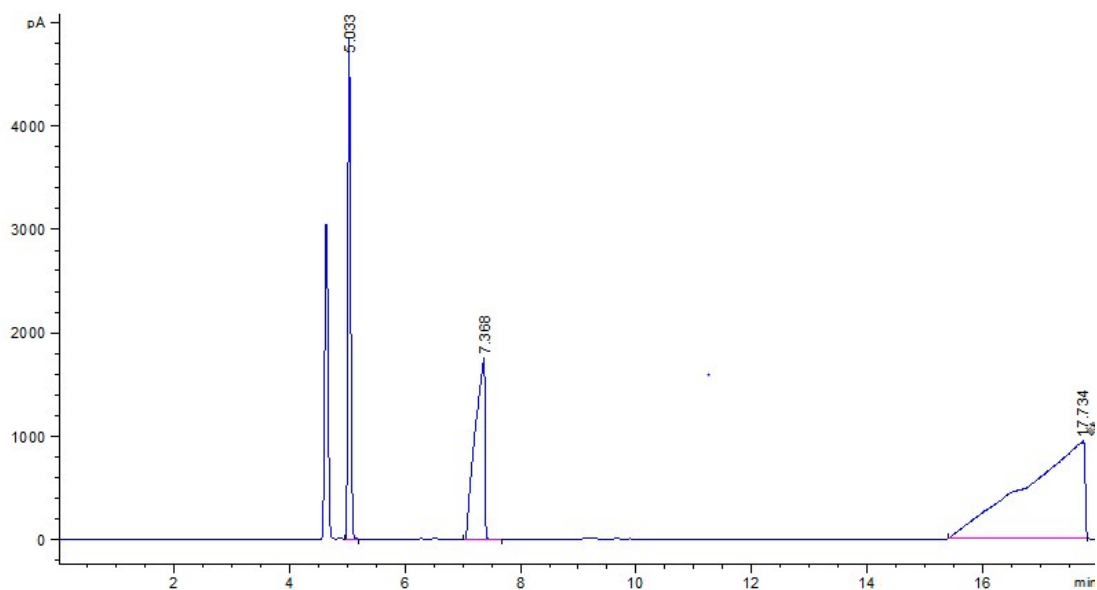

**Fig. S4.** Representative GC chromatography

**Table S2** Detailed information of the representative GC chromatography

| Retention time [min] | Peak area [pA*s] | Content [ng/ $\mu$ l] | Substance                           |
|----------------------|------------------|-----------------------|-------------------------------------|
| 5.033                | 1.64582e4        | 2.96                  | Propylene oxide                     |
| 7.368                | 2.04866e4        | 2.10                  | n-Butyl alcohol (internal standard) |
| 17.734               | 6.56175e4        | 13.26                 | Cyclic carbonate                    |

## N<sub>2</sub> adsorption and desorption analysis

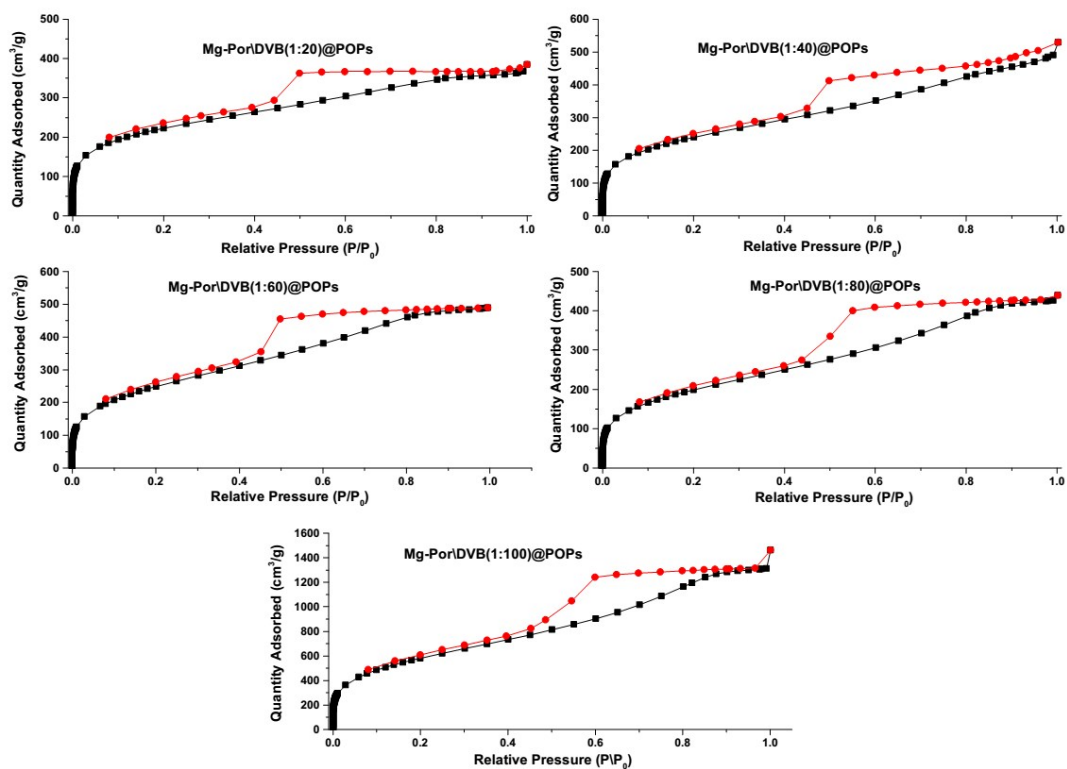

Fig. S5. N<sub>2</sub> sorption isotherms measured at 77 K.

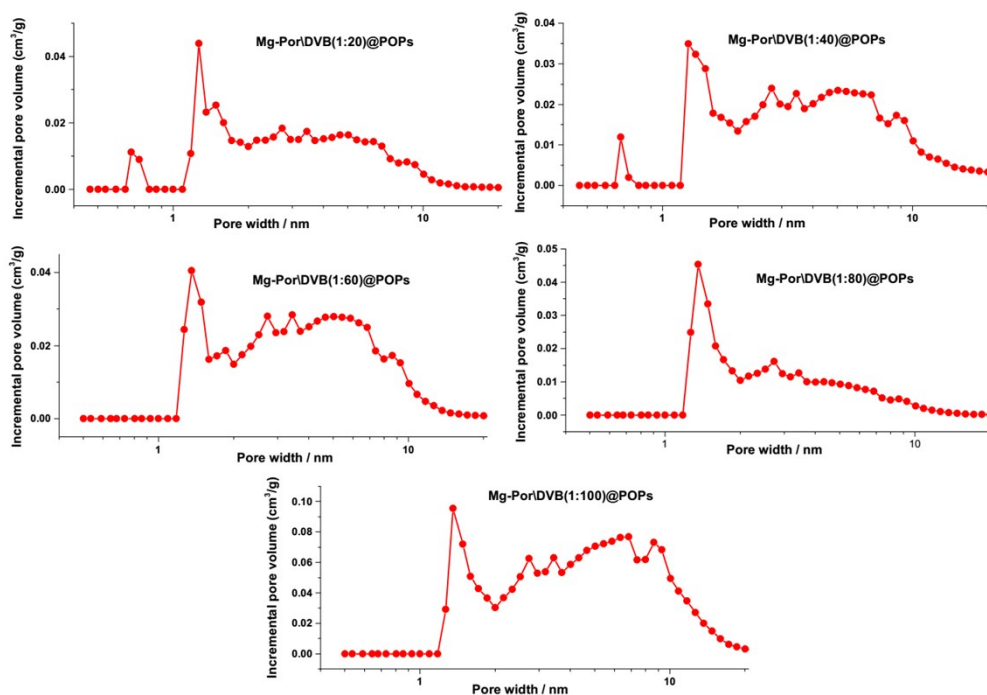

Fig. S6. Pore-size distribution curve of five Mg-PorDVB@POPs samples calculated by NLDFT method.



## SEM&TEM characterization

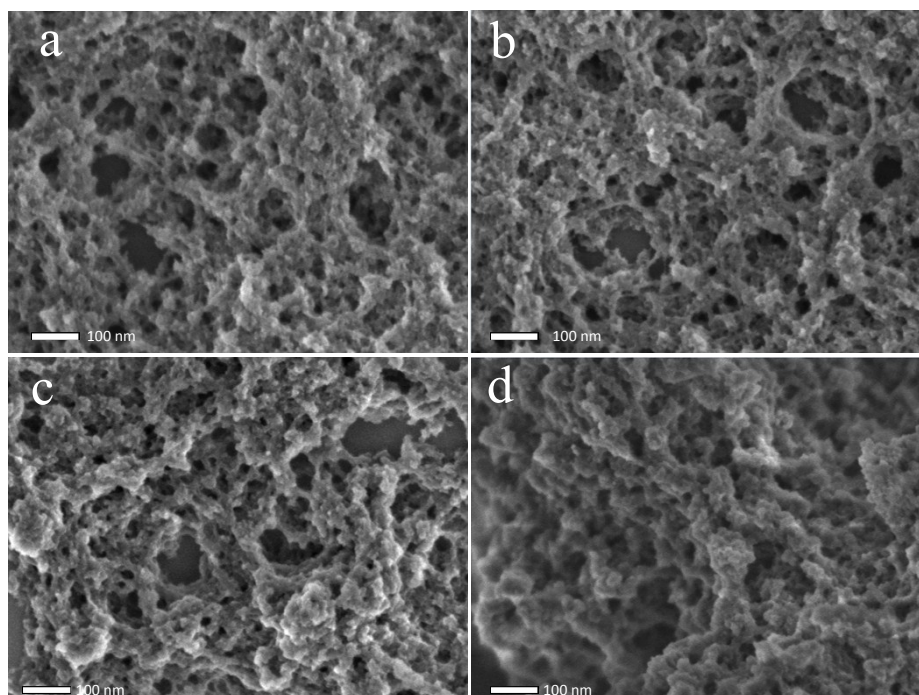

**Fig. S7.** Representative SEM images of the other four Mg-Por\DVB@POPs samples. a). Mg-Por\DVB(1:40)@POPs; b). Mg-Por\DVB(1:60)@POPs; c). Mg-Por\DVB(1:80)@POPs; d). Mg-Por\DVB(1:100)@POPs.

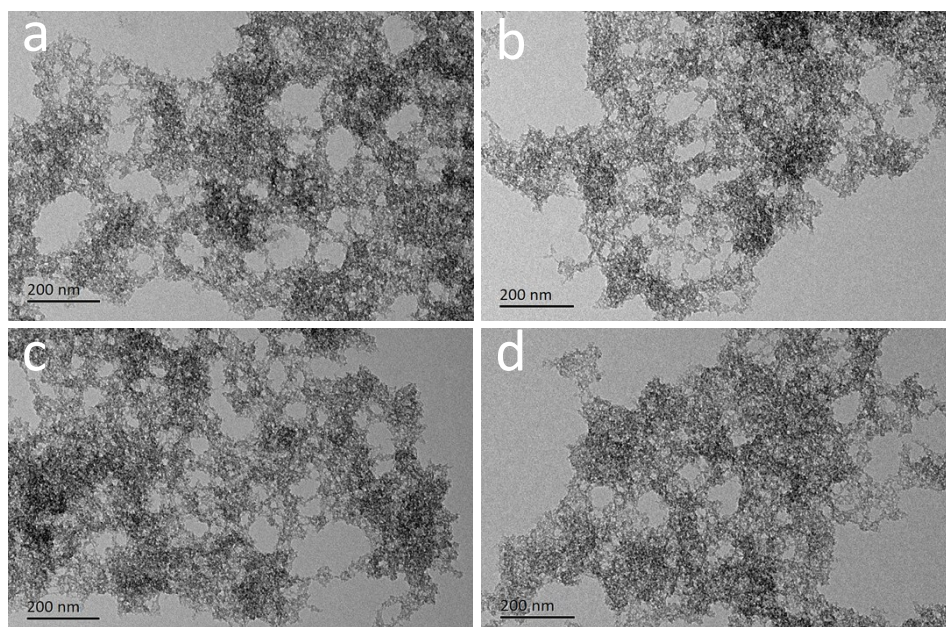

**Fig. S8.** Representative TEM images of the other four Mg-Por\DVB@POPs samples. a). Mg-Por\DVB(1:40)@POPs; b). Mg-Por\DVB(1:60)@POPs; c). Mg-Por\DVB(1:80)@POPs; d). Mg-Por\DVB(1:100)@POPs.

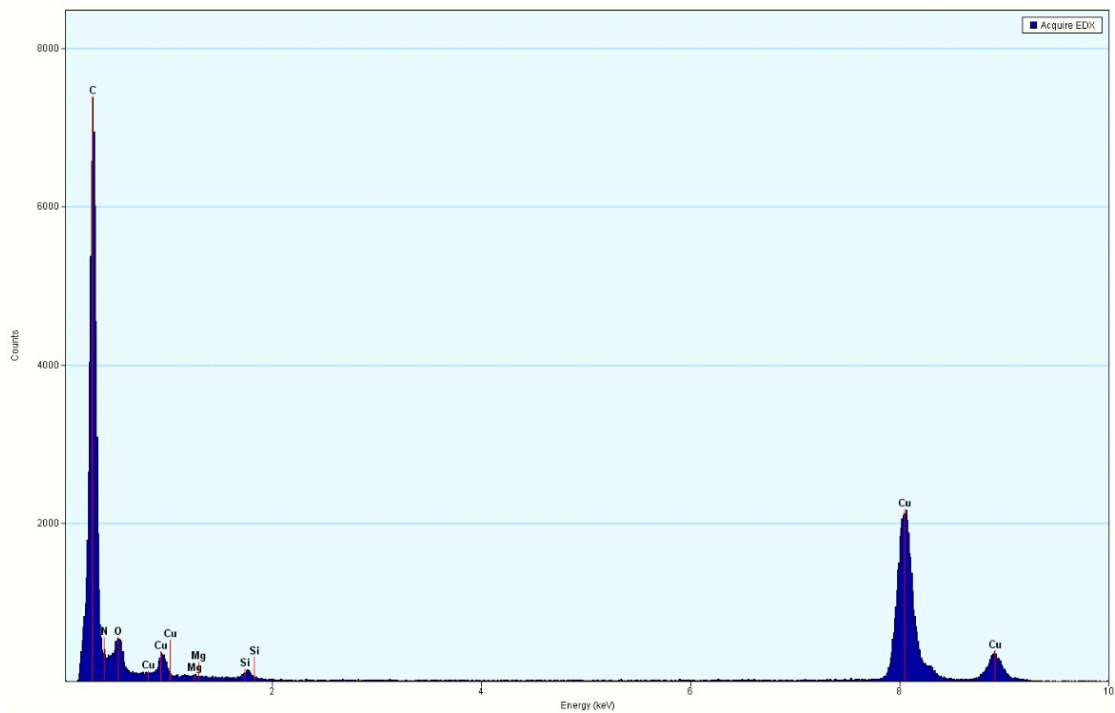

**Fig. S9.** TEM-EDS Characterization of Mg-Por/DVB(1:20)@POPs

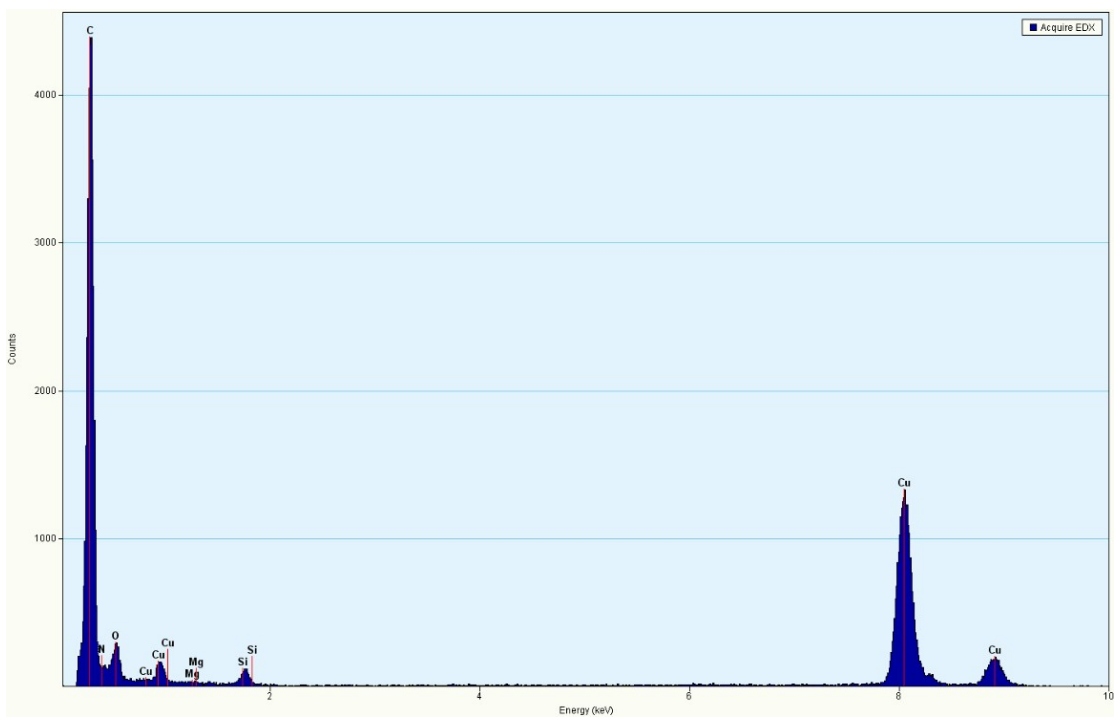

**Fig. S10.** TEM-EDS Characterization of Mg-Por/DVB(1:40)@POPs

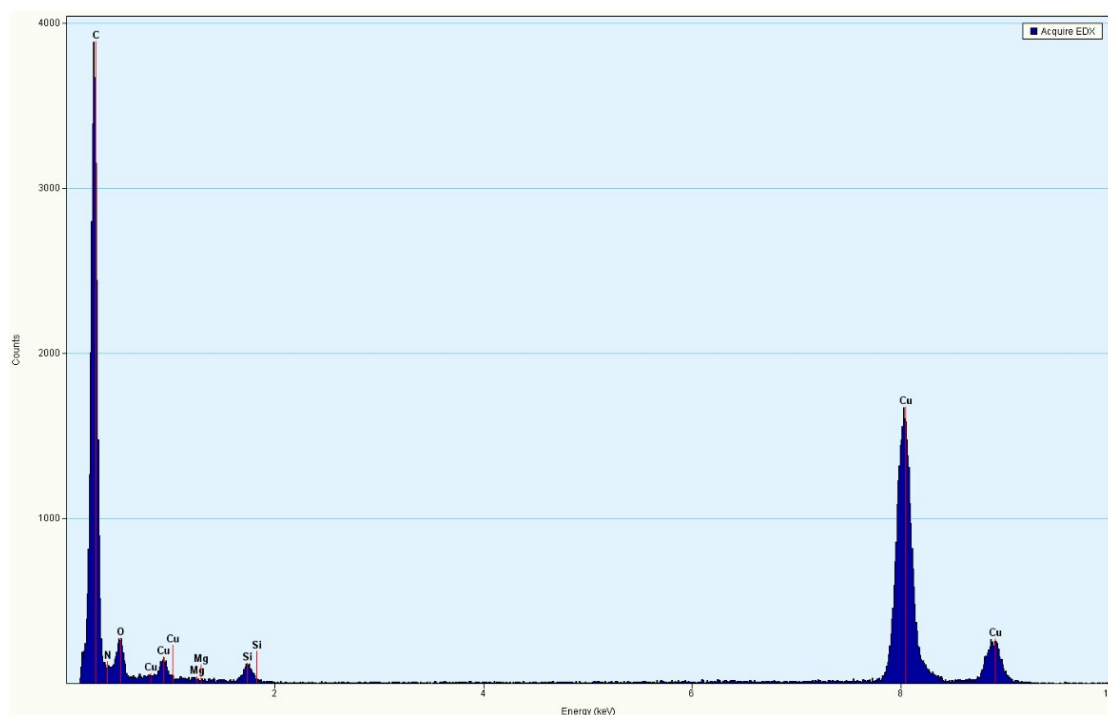

**Fig. S11.** TEM-EDS Characterization of Mg-Por/DVB(1:60)@POPs

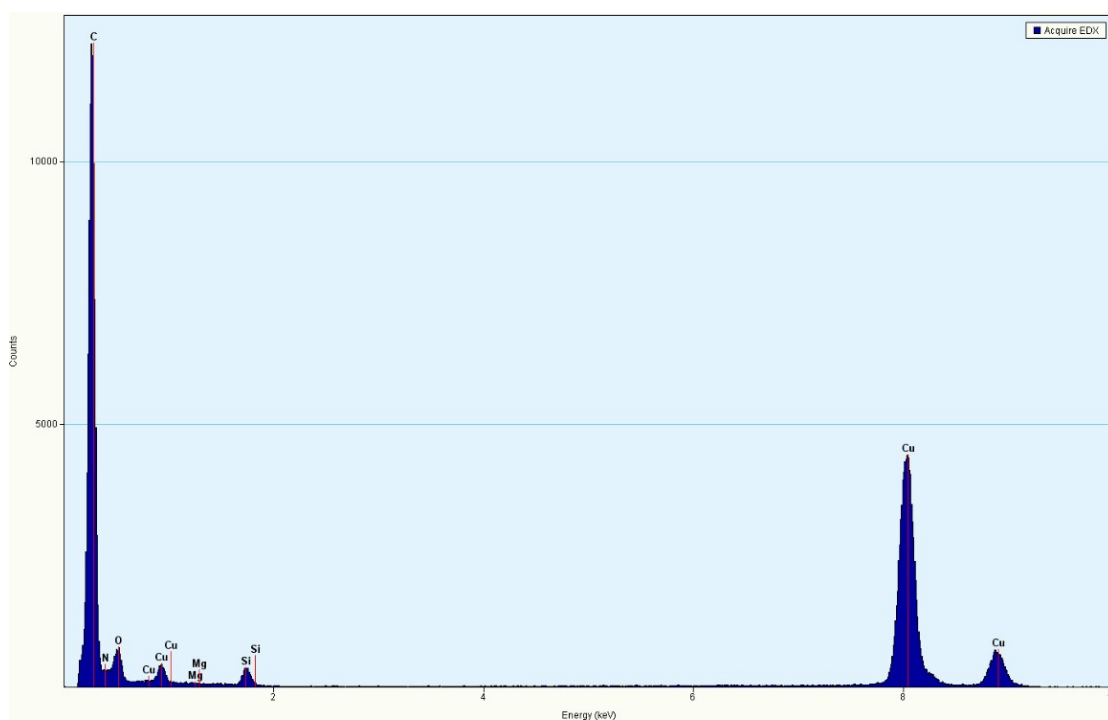

**Fig. S12.** TEM-EDS Characterization of Mg-Por/DVB(1:80)@POPs

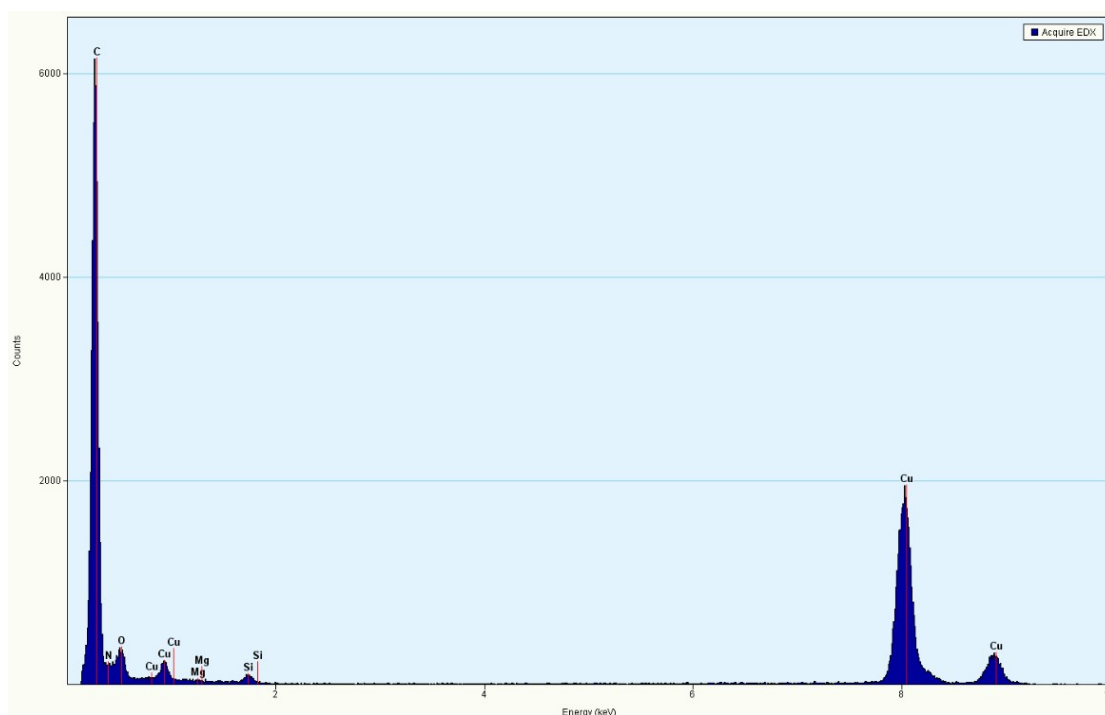

**Fig. S13.** TEM-EDS Characterization of Mg-Por\DVB(1:100)@POPs

### Solid-state $^{13}\text{C}$ NMR spectra

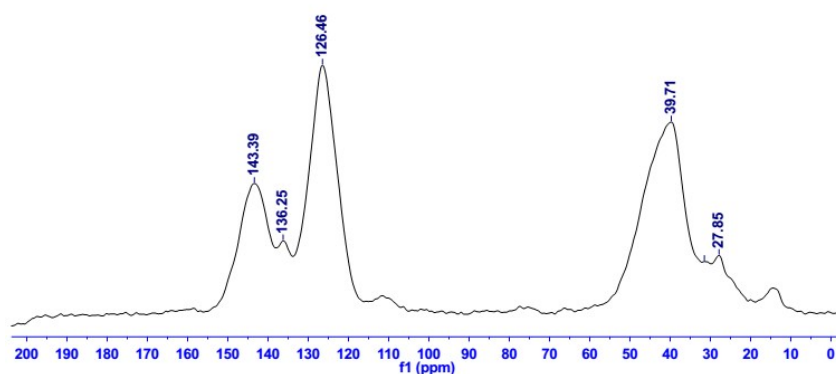

**Fig. S14.** Solid-state spectrum of Mg-Por\DVB(1:40)@POPs

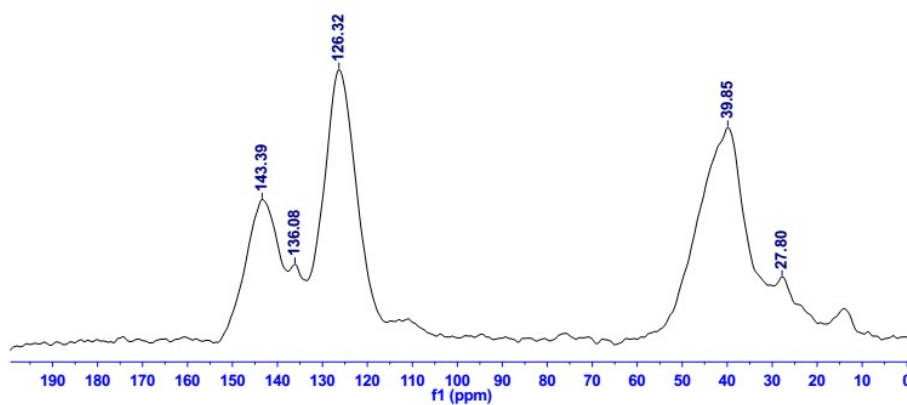

**Fig. S15.** Solid-state spectrum of Mg-Por\DVB(1:60)@POPs

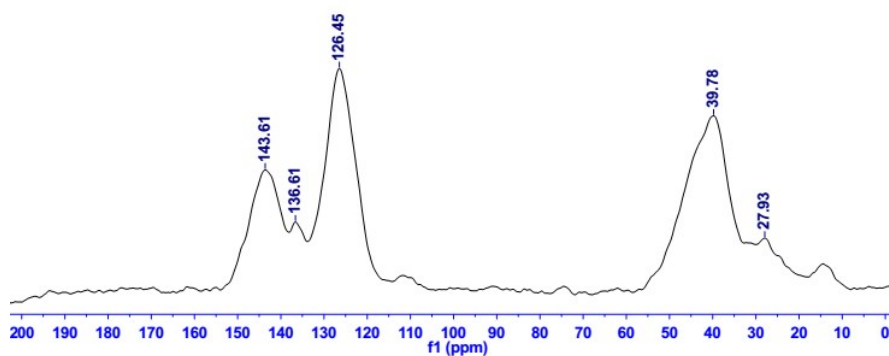

**Fig. S16.** Solid-state spectrum of Mg-Por\DVB(1:80)@POPs

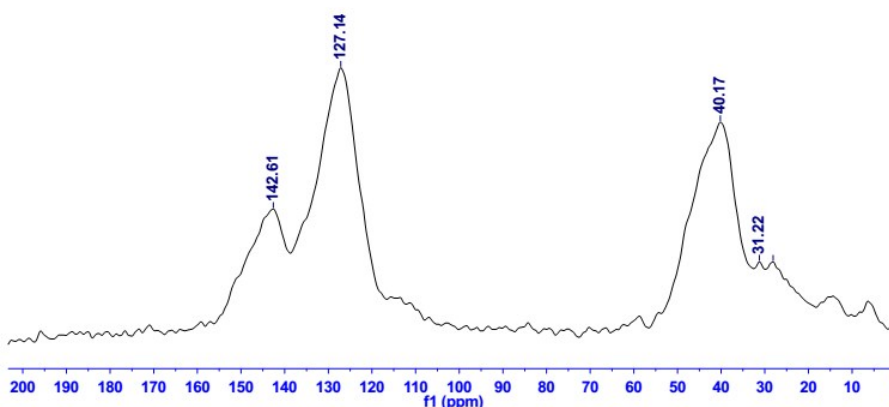

**Fig. S17.** Solid-state spectrum of Mg-Por\DVB(1:100)@POPs

## Elemental analysis data

**Table S3.** Elemental analysis data of the five Mg-Por\DVB@POPs samples

| <b>Theoretical values</b>     |              |              |              |
|-------------------------------|--------------|--------------|--------------|
| <b>Sample</b>                 | <b>C wt%</b> | <b>H wt%</b> | <b>N wt%</b> |
| <b>Mg-Por\DVB(1:20)@POPs</b>  | 90.48        | 7.11         | 1.68         |
| <b>Mg-Por\DVB(1:40)@POPs</b>  | 91.26        | 7.39         | 0.94         |
| <b>Mg-Por\DVB(1:60)@POPs</b>  | 91.56        | 7.50         | 0.66         |
| <b>Mg-Por\DVB(1:80)@POPs</b>  | 91.72        | 7.55         | 0.50         |
| <b>Mg-Por\DVB(1:100)@POPs</b> | 91.82        | 7.60         | 0.41         |
| <b>Experimental values</b>    |              |              |              |
| <b>Mg-Por\DVB(1:20)@POPs</b>  | 90.50        | 7.08         | 1.65         |
| <b>Mg-Por\DVB(1:40)@POPs</b>  | 91.29        | 7.37         | 0.92         |
| <b>Mg-Por\DVB(1:60)@POPs</b>  | 91.60        | 7.52         | 0.63         |
| <b>Mg-Por\DVB(1:80)@POPs</b>  | 91.75        | 7.58         | 0.49         |
| <b>Mg-Por\DVB(1:100)@POPs</b> | 91.85        | 7.64         | 0.39         |

**Table S4.** Comparison of elemental analysis data and ICP data of the five Mg-Por\DVB@POPs samples

| Sample                 | Mg content calculated from elemental analysis (wt%) | Mg content tested from ICP analysis (wt%) |
|------------------------|-----------------------------------------------------|-------------------------------------------|
| Mg-Por\DVB(1:20)@POPs  | 0.77                                                | 0.70                                      |
| Mg-Por\DVB(1:40)@POPs  | 0.42                                                | 0.38                                      |
| Mg-Por\DVB(1:60)@POPs  | 0.25                                                | 0.29                                      |
| Mg-Por\DVB(1:80)@POPs  | 0.18                                                | 0.20                                      |
| Mg-Por\DVB(1:100)@POPs | 0.12                                                | 0.19                                      |

### XPS analysis of Mg bonding energy of the five Mg-Por\DVB@POPs samples

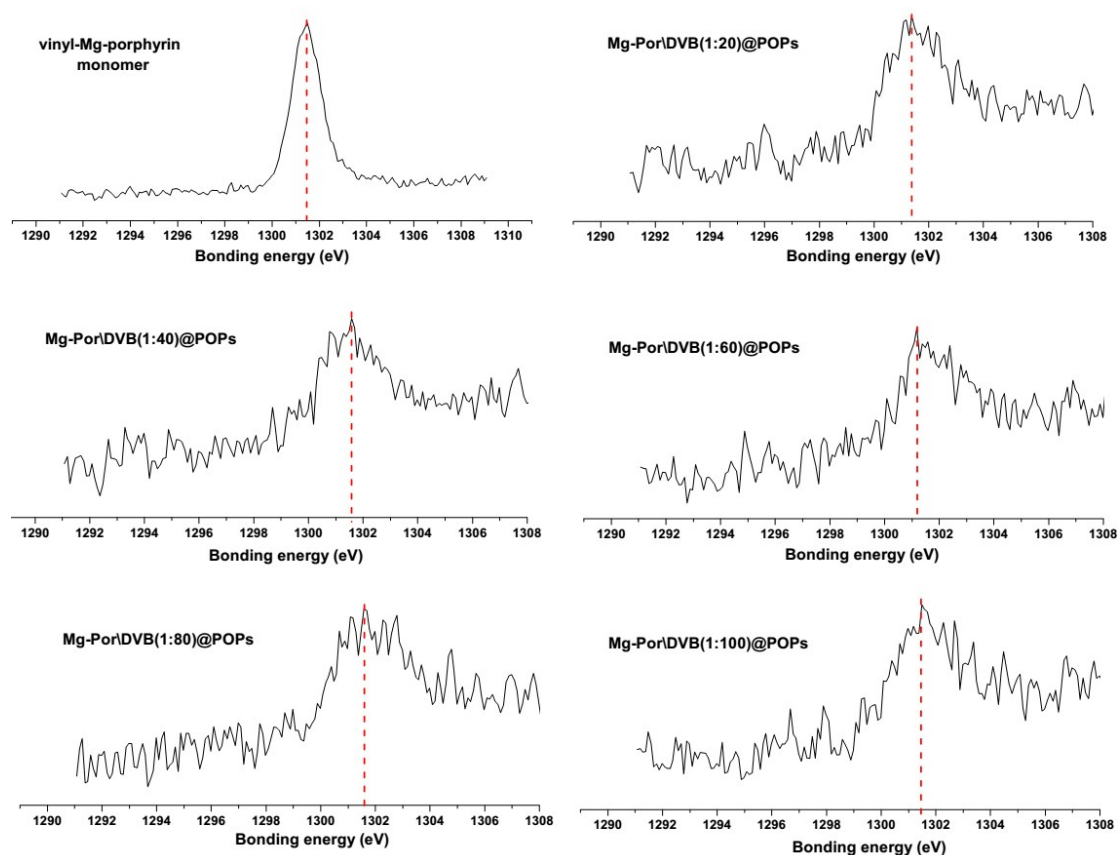

**Fig. S18.** XPS analysis of Mg bonding energy of the vinyl-Mg-porphyrin monomer and five Mg-Por\DVB@POPs samples
